# Supplementary material for: Non-doped white organic light-emitting diodes with superior efficiency/color stability by employing ultra-thin phosphorescent emitters
Source: Royal Society of Chemistry journal article supplement (doi:10.1039/c8tc00132d), 2018-01-01
Supplement: c8tc00132d1.pdf [file c8tc00132d1.pdf]

## Supporting Information

### **Non-doped white organic light-emitting diodes with superior efficiency/color stability by employing ultra-thin phosphorescent emitter**

Bo Zhao,<sup>a\*</sup> Heng Zhang,<sup>a</sup> Ziqi Wang,<sup>a</sup> Yanqin Miao,<sup>a</sup> Zhongqiang Wang,<sup>a</sup> Jie Li,<sup>a\*</sup> Hua Wang,<sup>a</sup>  
Yuying Hao,<sup>b</sup> Wenlian Li<sup>c</sup>

<sup>a</sup>Key Laboratory of Interface Science and Engineering in Advanced Materials of Ministry of Education, and Research Center of Advanced Materials Science and Technology, Taiyuan University of Technology, Taiyuan 030024, China

<sup>b</sup>Key Laboratory of Advanced Transducers and Intelligent Control System of Ministry of Education, and College of Physics and Optoelectronics, Taiyuan University of Technology, Taiyuan 030024, China

<sup>c</sup>State Key Laboratory of Luminescence and Applications, Changchun Institute of Optics, Fine Mechanics and Physics, Chinese Academy of Sciences, Changchun 130033, China

#### **Corresponding Authors**

\*E-mail: zhaobo01@tyut.edu.cn and lijie01@tyut.edu.cn

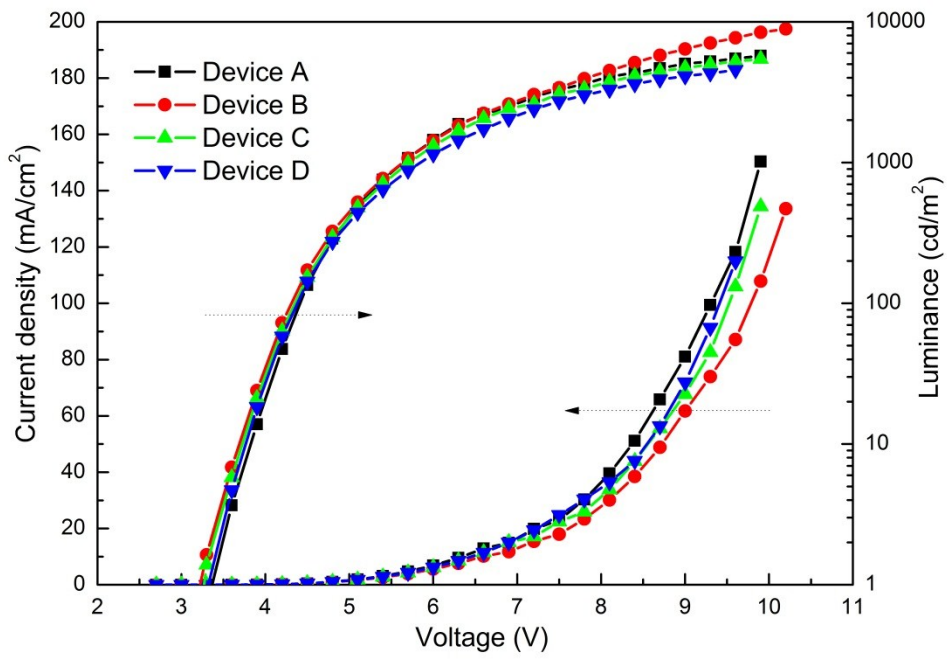

Fig. S1 The current density-voltage-luminance curves of Device A to Device D.

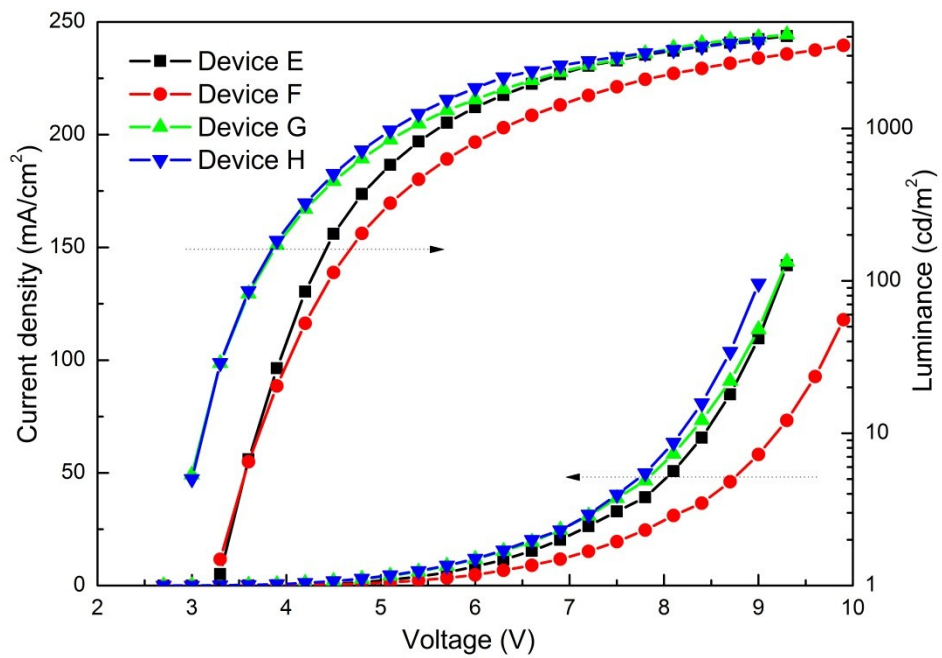

Fig. S2 The current density-voltage-luminance curves of Device E to Device H.
